# Supplementary material
Source: HighWire-hosted journal article supplement (https://jech.bmj.com/content/75/6/509)
Supplement: inline-supplementary-material-1 [file inline-supplementary-material-1.pdf]

## Supplementary tables

*Supplementary Table 1. Hazard ratios (and 95% confidence intervals) for COVID 19 related mortality between 2 March 2020 and 15 May 2020 in England and Wales for non-Christian religious groups compared to Christians, stratified by sex. males*

|                            | <b>Model 1</b>   | <b>Model 2</b>              | <b>Model 3</b>                          | <b>Model 4</b>              |
|----------------------------|------------------|-----------------------------|-----------------------------------------|-----------------------------|
|                            | <b>+Age</b>      | <b>+Geography Variables</b> | <b>+Socio economic status variables</b> | <b>+Household variables</b> |
| <b>No religion</b>         | 0.82 (0.79-0.86) | 0.82 (0.78-0.86)            | 0.85 (0.82-0.89)                        | 0.84 (0.80-0.88)            |
| <b>Buddhist</b>            | 1.19 (0.92-1.54) | 1.02 (0.79-1.31)            | 1.09 (0.85-1.42)                        | 1.07 (0.83-1.39)            |
| <b>Hindu</b>               | 1.88 (1.69-2.09) | 1.32 (1.19-1.47)            | 1.39 (1.24-1.56)                        | 1.44 (1.28-1.61)            |
| <b>Jewish</b>              | 2.14 (1.89-2.42) | 1.54 (1.36-1.74)            | 1.84 (1.63-2.09)                        | 1.89 (1.67-2.14)            |
| <b>Muslim</b>              | 2.49 (2.32-2.67) | 1.67 (1.55-1.79)            | 1.51 (1.38-1.64)                        | 1.52 (1.39-1.66)            |
| <b>Sikh</b>                | 1.54 (1.32-1.81) | 1.18 (1.00-1.38)            | 1.13 (0.95-1.33)                        | 1.20 (1.02-1.42)            |
| <b>Other</b>               | 0.90 (0.69-1.17) | 0.77 (0.59-1.00)            | 0.80 (0.61-1.04)                        | 0.78 (0.60-1.02)            |
| <b>Religion not stated</b> | 0.88 (0.83-0.93) | 0.87 (0.82-0.92)            | 0.86 (0.81-0.90)                        | 0.84 (0.80-0.89)            |

  

|                            | <b>Model 5</b>                        | <b>Model 6</b>                         | <b>Model 7</b>   |
|----------------------------|---------------------------------------|----------------------------------------|------------------|
|                            | <b>Self-reported health variables</b> | <b>Occupational Exposure variables</b> | <b>Ethnicity</b> |
| <b>No religion</b>         | 0.83 (0.80-0.87)                      | 0.83 (0.80-0.87)                       | 0.84 (0.80-0.87) |
| <b>Buddhist</b>            | 1.09 (0.84-1.41)                      | 1.08 (0.84-1.40)                       | 0.88 (0.68-1.14) |
| <b>Hindu</b>               | 1.38 (1.23-1.55)                      | 1.39 (1.24-1.56)                       | 0.95 (0.84-1.07) |
| <b>Jewish</b>              | 1.89 (1.67-2.14)                      | 1.90 (1.68-2.15)                       | 1.92 (1.69-2.17) |
| <b>Muslim</b>              | 1.43 (1.30-1.56)                      | 1.43 (1.30-1.56)                       | 1.03 (0.94-1.13) |
| <b>Sikh</b>                | 1.16 (0.99-1.37)                      | 1.18 (1.00-1.39)                       | 0.79 (0.67-0.94) |
| <b>Other</b>               | 0.75 (0.58-0.98)                      | 0.76 (0.58-0.99)                       | 0.65 (0.50-0.85) |
| <b>Religion not stated</b> | 0.83 (0.79-0.88)                      | 0.83 (0.79-0.88)                       | 0.83 (0.78-0.87) |

*Supplementary Table 2. Hazard ratios (and 95% confidence intervals) for COVID 19 related mortality between 2 March 2020 and 15 May 2020 in England and Wales for non-Christian religious groups compared to Christians, stratified by sex, females*

|                            | <b>Model 1</b>   | <b>Model 2</b>              | <b>Model 3</b>                          | <b>Model 4</b>              |
|----------------------------|------------------|-----------------------------|-----------------------------------------|-----------------------------|
|                            | <b>+Age</b>      | <b>+Geography Variables</b> | <b>+Socio economic status variables</b> | <b>+Household variables</b> |
| <b>No religion</b>         | 0.83 (0.78-0.89) | 0.83 (0.78-0.89)            | 0.88 (0.82-0.94)                        | 0.87 (0.82-0.93)            |
| <b>Buddhist</b>            | 0.95 (0.68-1.32) | 0.79 (0.57-1.10)            | 0.96 (0.68-1.34)                        | 0.94 (0.67-1.31)            |
| <b>Hindu</b>               | 1.81 (1.58-2.06) | 1.30 (1.14-1.49)            | 1.48 (1.28-1.72)                        | 1.52 (1.31-1.77)            |
| <b>Jewish</b>              | 1.50 (1.29-1.74) | 1.12 (0.96-1.30)            | 1.22 (1.04-1.42)                        | 1.26 (1.08-1.47)            |
| <b>Muslim</b>              | 1.90 (1.72-2.10) | 1.34 (1.21-1.48)            | 1.28 (1.13-1.46)                        | 1.29 (1.14-1.47)            |
| <b>Sikh</b>                | 1.25 (1.02-1.53) | 0.98 (0.80-1.21)            | 1.05 (0.85-1.31)                        | 1.05 (0.85-1.31)            |
| <b>Other</b>               | 0.81 (0.60-1.09) | 0.80 (0.59-1.07)            | 0.85 (0.63-1.15)                        | 0.83 (0.61-1.12)            |
| <b>Religion not stated</b> | 0.84 (0.79-0.89) | 0.83 (0.78-0.88)            | 0.82 (0.77-0.88)                        | 0.81 (0.76-0.86)            |

  

|                            | <b>Model 5</b>                         | <b>Model 6</b>                          | <b>Model 7</b>    |
|----------------------------|----------------------------------------|-----------------------------------------|-------------------|
|                            | <b>+Self-reported health variables</b> | <b>+Occupational Exposure variables</b> | <b>+Ethnicity</b> |
| <b>No religion</b>         | 0.87 (0.81-0.93)                       | 0.87 (0.81-0.93)                        | 0.87 (0.82-0.93)  |
| <b>Buddhist</b>            | 0.81 (0.58-1.14)                       | 0.80 (0.57-1.12)                        | 0.68 (0.48-0.96)  |
| <b>Hindu</b>               | 1.38 (1.18-1.60)                       | 1.38 (1.19-1.61)                        | 1.09 (0.93-1.28)  |
| <b>Jewish</b>              | 1.19 (1.02-1.39)                       | 1.20 (1.03-1.39)                        | 1.21 (1.04-1.41)  |
| <b>Muslim</b>              | 1.13 (0.99-1.29)                       | 1.12 (0.98-1.27)                        | 0.92 (0.80-1.05)  |
| <b>Sikh</b>                | 0.97 (0.78-1.21)                       | 0.97 (0.78-1.21)                        | 0.77 (0.61-0.96)  |
| <b>Other</b>               | 0.74 (0.54-0.99)                       | 0.74 (0.55-1.00)                        | 0.70 (0.52-0.95)  |
| <b>Religion not stated</b> | 0.80 (0.75-0.85)                       | 0.80 (0.75-0.85)                        | 0.79 (0.75-0.85)  |

Supplementary figure 1. Male Schoenfeld residuals from Age adjusted Cox Regression model

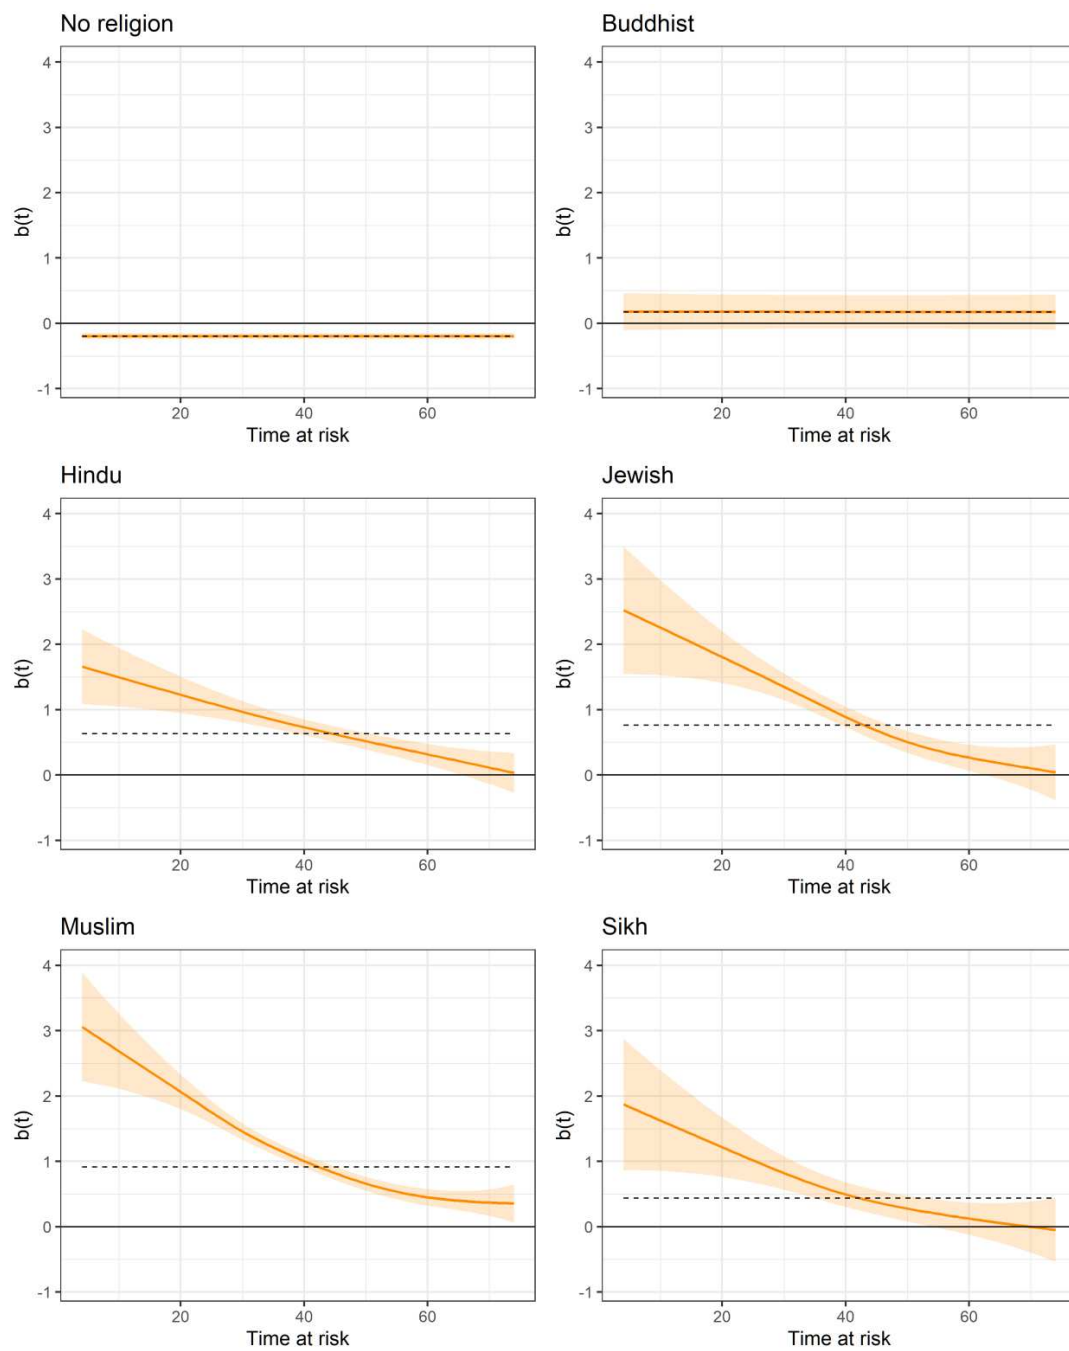

Supplementary figure 2. Female Schoenfeld residuals from Age adjusted Cox Regression model

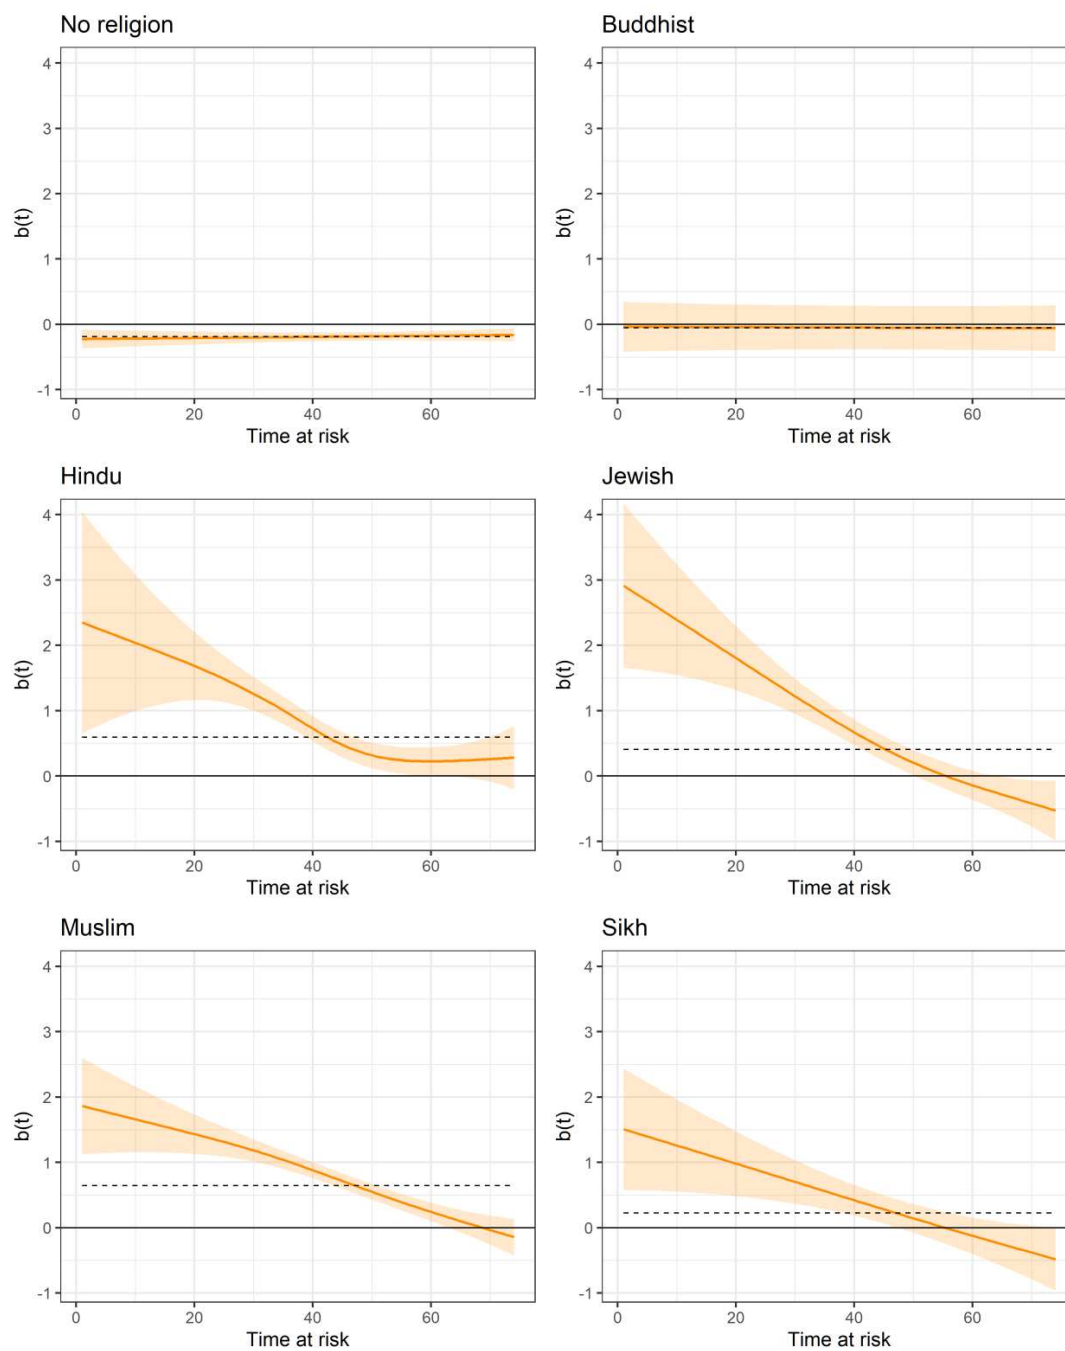

*Supplementary table 3. Pre and post lockdown, age adjusted hazard ratios of COVID 19 related mortality between 2 March 2020 and 15 May 2020 in England and Wales for non-Christian religious groups compared to Christians, stratified by sex. males*

|                            | <b>Pre Lockdown</b> | <b>Post Lockdown</b> |
|----------------------------|---------------------|----------------------|
| <b>No religion</b>         | 0.85 (0.78-0.81)    | 0.92 (0.81-0.85)     |
| <b>Buddhist</b>            | 1.46 (0.93-1.09)    | 2.29 (1.09-1.49)     |
| <b>Hindu</b>               | 2.59 (2.17-1.63)    | 3.08 (1.63-1.86)     |
| <b>Jewish</b>              | 3.53 (2.94-1.63)    | 4.25 (1.63-1.92)     |
| <b>Muslim</b>              | 3.97 (3.56-1.96)    | 4.42 (1.96-2.15)     |
| <b>Sikh</b>                | 2.23 (1.73-1.30)    | 2.88 (1.30-1.58)     |
| <b>Other religion</b>      | 0.93 (0.56-0.89)    | 1.55 (0.89-1.21)     |
| <b>Religion not stated</b> | 0.90 (0.81-0.87)    | 1.00 (0.87-0.93)     |

*Supplementary table 4. Pre and post lockdown, age adjusted hazard ratios of COVID 19 related mortality between 2 March 2020 and 15 May 2020 in England and Wales for non-Christian religious groups compared to Christians, stratified by sex. females*

|                            | <b>Pre Lockdown</b> | <b>Post Lockdown</b> |
|----------------------------|---------------------|----------------------|
| <b>No religion</b>         | 0.97 (0.85-0.79)    | 1.10 (0.79-0.86)     |
| <b>Buddhist</b>            | 1.18 (0.62-0.89)    | 2.28 (0.89-1.30)     |
| <b>Hindu</b>               | 3.53 (2.87-1.35)    | 4.35 (1.35-1.61)     |
| <b>Jewish</b>              | 3.02 (2.39-1.10)    | 3.81 (1.10-1.34)     |
| <b>Muslim</b>              | 3.60 (3.07-1.46)    | 4.21 (1.46-1.65)     |
| <b>Sikh</b>                | 1.98 (1.39-1.06)    | 2.82 (1.06-1.35)     |
| <b>Other religion</b>      | 1.10 (0.62-0.74)    | 1.93 (0.74-1.05)     |
| <b>Religion not stated</b> | 0.92 (0.81-0.82)    | 1.05 (0.82-0.88)     |

*Supplementary table 5. Percentage of each religious group associating with white and non-white ethnicities in England and Wales*

|                            | <b>Percentage of deaths involving COVID-19 among White ethnic group</b> | <b>Percentage of deaths involving COVID-19 among non-White ethnic groups</b> | <b>Percentage identifying as White at the 2011 Census</b> | <b>Percentage identifying as non-White at the 2011 Census</b> |
|----------------------------|-------------------------------------------------------------------------|------------------------------------------------------------------------------|-----------------------------------------------------------|---------------------------------------------------------------|
| <b>No religion</b>         | 94.00%                                                                  | 6.00%                                                                        | 94.30%                                                    | 5.70%                                                         |
| <b>Christian</b>           | 94.10%                                                                  | 5.90%                                                                        | 93.00%                                                    | 7.00%                                                         |
| <b>Buddhist</b>            | 26.60%                                                                  | 73.40%                                                                       | 34.40%                                                    | 65.60%                                                        |
| <b>Hindu</b>               | 1.40%                                                                   | 98.60%                                                                       | 1.10%                                                     | 98.90%                                                        |
| <b>Jewish</b>              | 95.60%                                                                  | 4.40%                                                                        | 93.60%                                                    | 6.40%                                                         |
| <b>Muslim</b>              | 7.80%                                                                   | 92.20%                                                                       | 7.50%                                                     | 92.50%                                                        |
| <b>Sikh</b>                | 1.60%                                                                   | 98.40%                                                                       | 1.50%                                                     | 98.50%                                                        |
| <b>Other religion</b>      | 66.30%                                                                  | 33.70%                                                                       | 76.50%                                                    | 23.50%                                                        |
| <b>Religion not stated</b> | 90.60%                                                                  | 9.40%                                                                        | 87.40%                                                    | 12.60%                                                        |

*Source: Census 2011*

*Supplementary table 6. Percentage of each religious group falling in one of two socio economic classifications, 2012 and 2019*

|                    | <b>Managerial and Professional occupations</b> |             |                    | <b>Routine and Manual Occupations</b> |             |
|--------------------|------------------------------------------------|-------------|--------------------|---------------------------------------|-------------|
|                    | <b>2012</b>                                    | <b>2019</b> |                    | <b>2012</b>                           | <b>2019</b> |
| <b>No Religion</b> | 26.59%                                         | 28.89%      | <b>No Religion</b> | 19.59%                                | 18.04%      |
| <b>Christian</b>   | 22.91%                                         | 24.88%      | <b>Christian</b>   | 19.31%                                | 16.76%      |
| <b>Buddhist</b>    | 27.80%                                         | 28.50%      | <b>Buddhist</b>    | 23.53%                                | 21.39%      |
| <b>Hindu</b>       | 29.55%                                         | 32.51%      | <b>Hindu</b>       | 15.92%                                | 13.67%      |
| <b>Jewish</b>      | 36.86%                                         | 32.33%      | <b>Jewish</b>      | 4.35%                                 | 5.06%       |
| <b>Muslim</b>      | 10.88%                                         | 12.92%      | <b>Muslim</b>      | 14.14%                                | 12.86%      |
| <b>Sikh</b>        | 20.41%                                         | 25.03%      | <b>Sikh</b>        | 19.09%                                | 17.22%      |
| <b>Any Other</b>   | 29.61%                                         | 31.03%      | <b>Any Other</b>   | 16.33%                                | 15.25%      |

*Source: Annual Population Survey 2012 and 2019*
